# Supplementary material for: Bibliometric Study of Pain after Spinal Cord Injury
Source: Neural Plast. 2021 Feb 19;2021:6634644. doi: 10.1155/2021/6634644 (PMC7914384; doi:10.1155/2021/6634644)
Supplement: Supplementary 1 — Supplementary Figure 1: overview of the paper selection process. Supplementary Figure 2: the number of papers, citations, citations per paper, open-access papers, and H-index of the top 10 institutions. [file 6634644.f1.zip]

Archive with 2 entries (2 files):
- Supplementary figure1.docx
- Supplementary figure2 .docx
